# Supplementary material for: Ultra-sensitive flexible sandwich structural strain sensors based on a silver nanowire supported PDMS/PVDF electrospun membrane substrate
Source: Royal Society of Chemistry journal article supplement (doi:10.1039/d0tc04659k), 2021-01-01
Supplement: d0tc04659k1.pdf [file d0tc04659k1.pdf]

Supporting information for

## **Ultra-Sensitive Flexible Sandwich Structural Strain Sensors Based on Silver Nanowires Supported PDMS/PVDF Electrospun Membrane Substrate**

Zhenhua Yang<sup>‡a</sup>, Zijian Wu<sup>‡\*a,b</sup>, Dawei Jiang<sup>c</sup>, Renbo Wei<sup>d,\*</sup>, Xianmin Mai<sup>e</sup>,  
Duo Pan<sup>f,h</sup>, Sravanthi Vupputuri<sup>d</sup>, Ling Weng<sup>\*a,b</sup>, Nithesh Naik<sup>g</sup> and Zhanhu Guo<sup>\*h</sup>

<sup>a</sup>Department of Material Science and Technology, Harbin University of Science and Technology, Harbin 150040, China

<sup>b</sup>Key Laboratory of Engineering Dielectric and Its Application Technology of Ministry of Education, Harbin University of Science and Technology, Harbin 150040, China

<sup>c</sup>Heilongjiang Key Laboratory of Molecular Design and Preparation of Flame Retarded Materials, Northeast Forestry University, Harbin 150040, China

<sup>d</sup>School of Chemical Engineering, Northwest University, Xi'an 710069, China

<sup>e</sup>School of Urban Planning and Architecture, Southwest Minzu University, Chengdu 610041, China

<sup>f</sup>Key Laboratory of Materials Processing and Mold (Zhengzhou University), Ministry of Education, National Engineering Research Center for Advanced Polymer Processing Technology, Zhengzhou University, Zhengzhou, 450001 China

<sup>g</sup>Department of Mechanical & Manufacturing Engineering, Manipal Institute of Technology, Manipal Academy of Higher Education, Manipal-576104, Karnataka, India

<sup>h</sup>Integrated Composites Lab (ICL), Department of Chemical and Biomolecular Engineering, University of Tennessee, Knoxville, TN, 37996, USA

<sup>‡</sup>Zhenhua Yang and Zijian Wu contributed equally to this work

\*Corresponding author.

Email: zijian.wu@hrbust.edu.cn (Z. Wu); wengling79@163.com (L. Weng); weirb10@nwu.edu.cn (R. Wen); zguo10@utk.edu (Z. Guo)

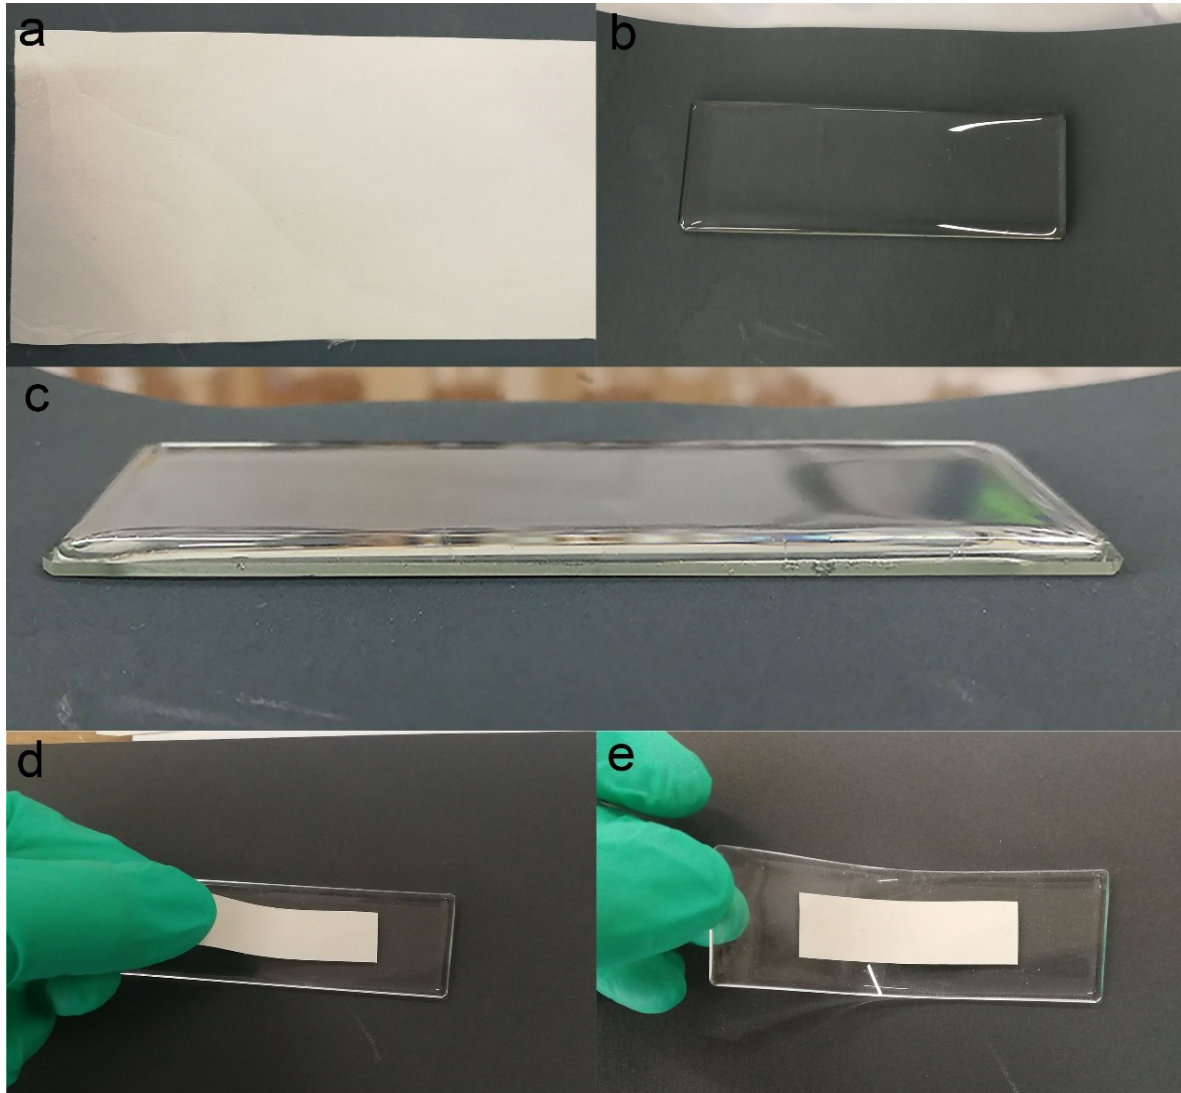

Fig.S1 a) PDMS/PVDF electrospun membrane ; b, c) PDMS after curing on glass slide ; d, e) Conductive layer bonding.

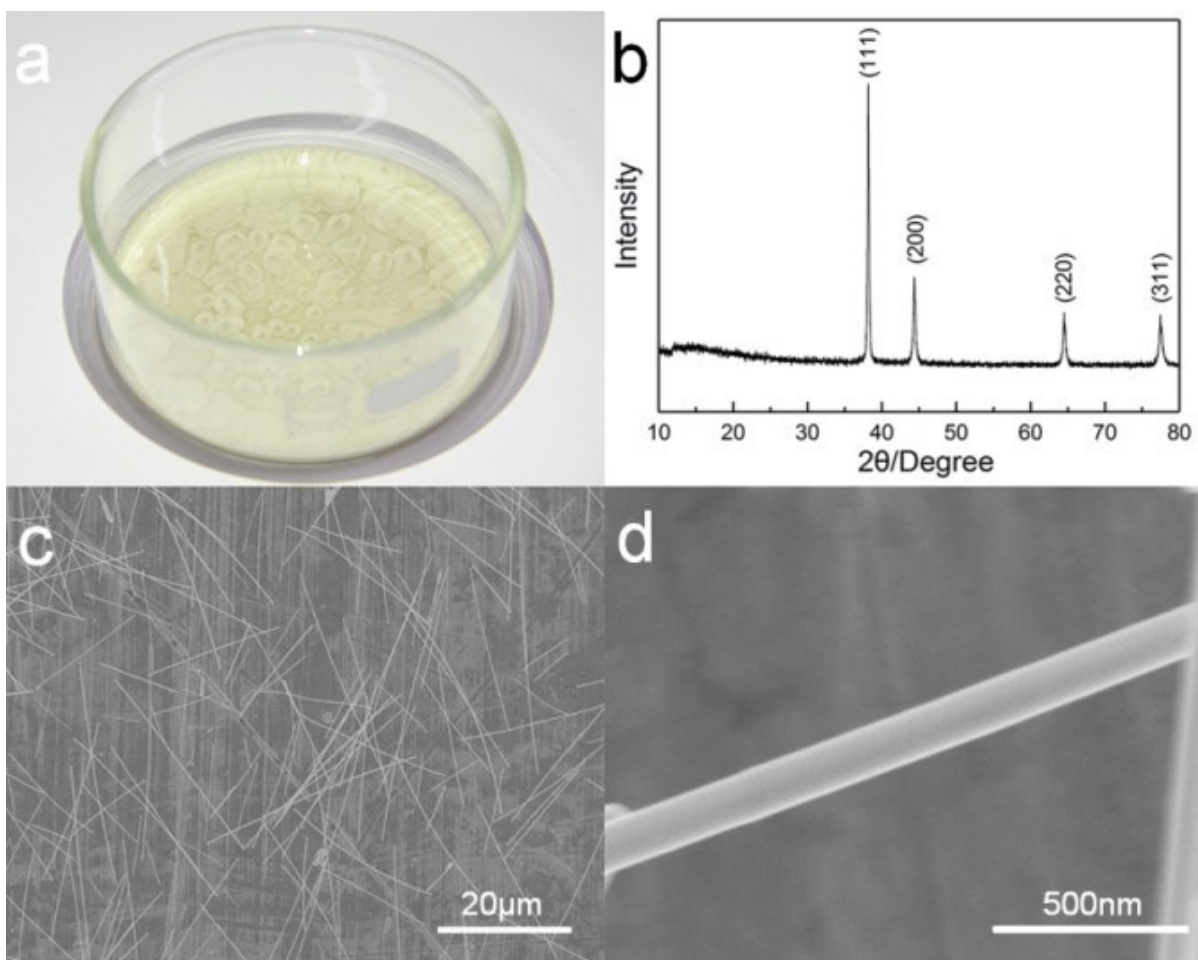

Fig.S2. a) Optical photograph of AgNWs dispersion; b) XRD patterns of AgNWs; and c&d) SEM images of AgNWs.

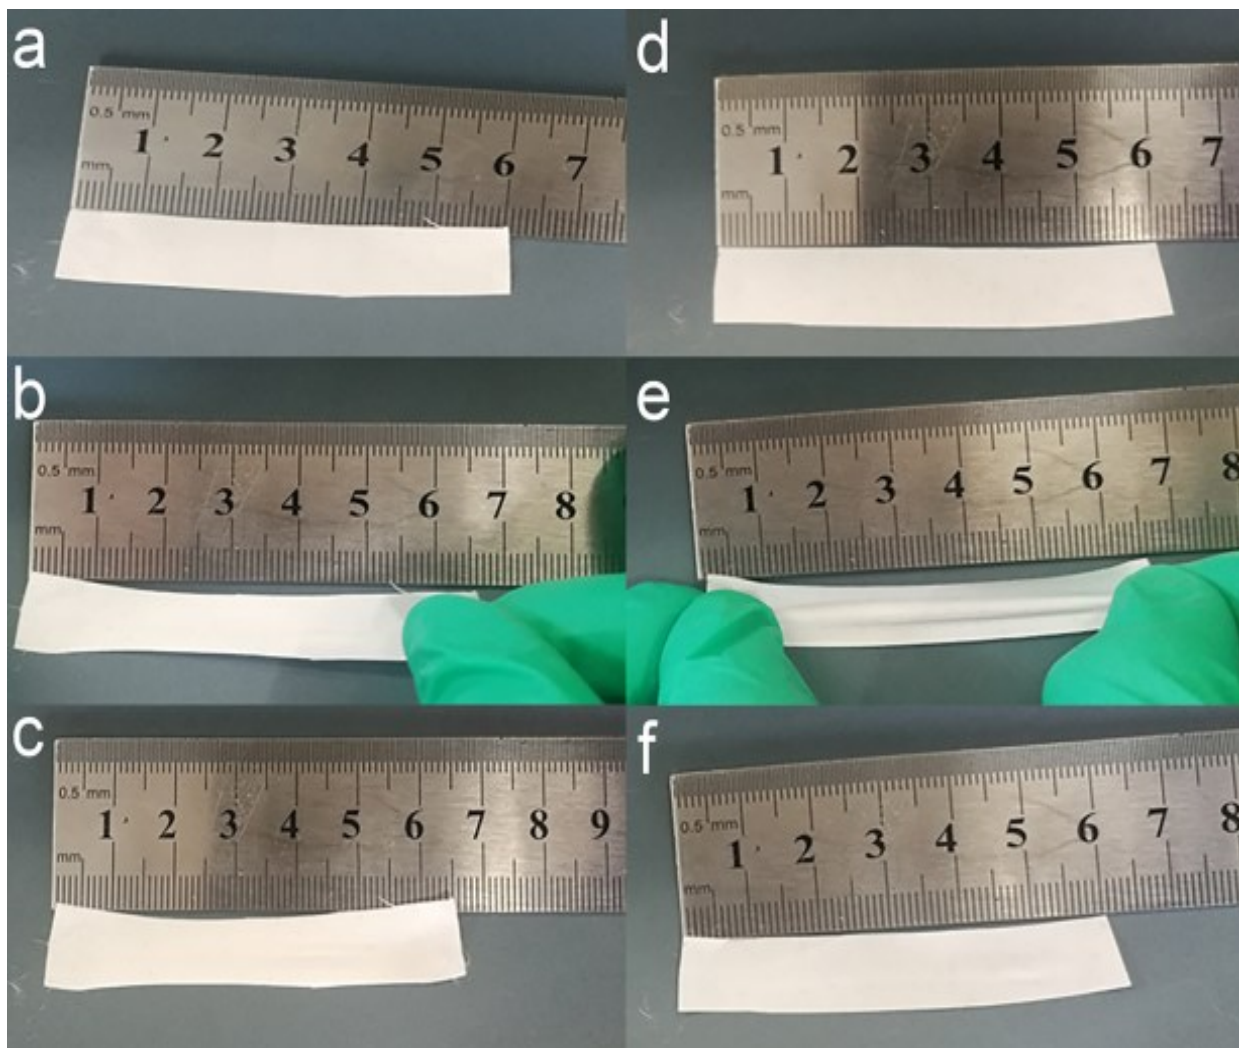

Fig.S3. The elastic resilience comparison between PVDF and PDMS/PVDF electrospun membranes. a) unstretched PVDF(6cm). b) Stretched PVDF(6.5cm) c) PVDF after removing the external force (6.5cm)). d) unstretched PDMS/PVDF (6cm). e) Stretched PDMS/PVDF (6.5cm) c) PDMS/PVDF after removing the external force (6cm)

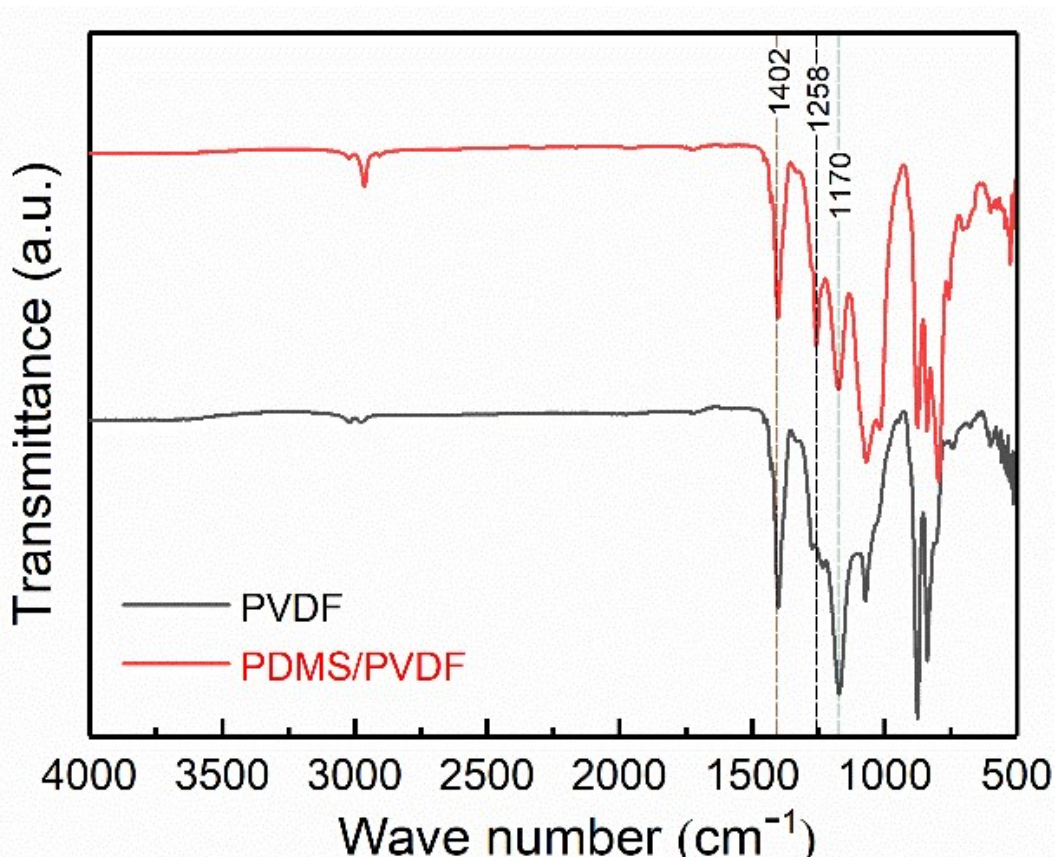

Fig.S4. FTIR of the PVDF and PDMS/PVDF electrospun membranes

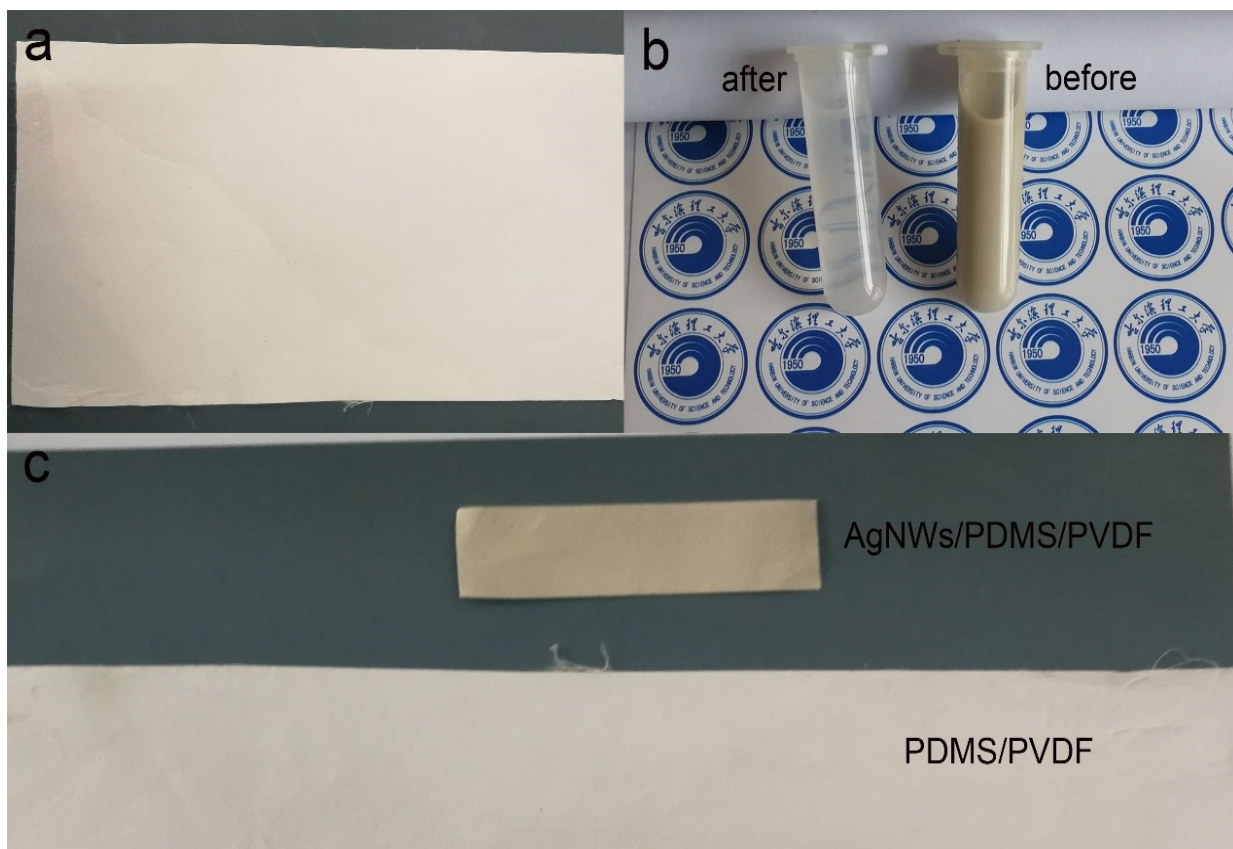

Fig.S5 a) PDMS/PVDF electrospun membrane ; b) Comparison of AgNWs / ethanol solution transparency before and after suction filtration ; c) PDMS/PVDF electrospun membrane loaded with conductive particles AgNWs

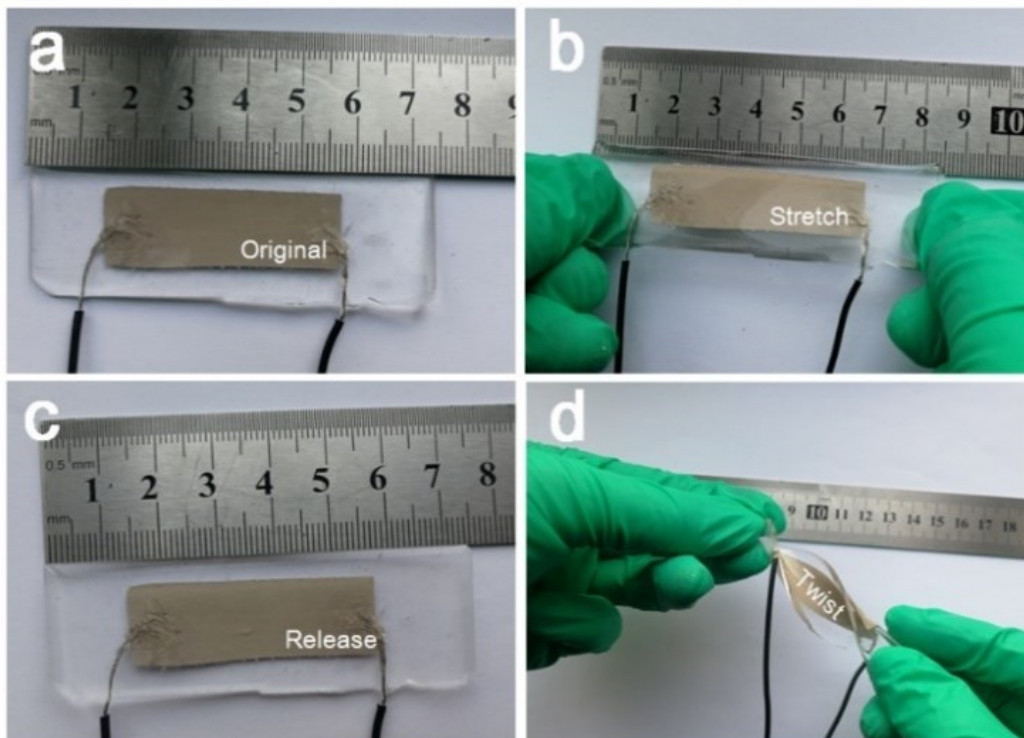

Fig. S6. Digital photos of PPAP flexible strain sensor.

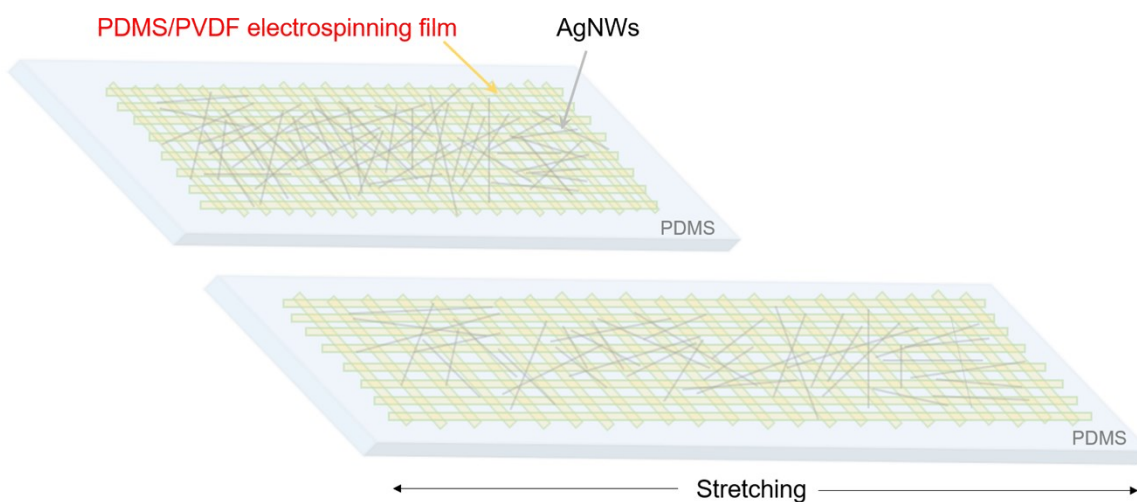

Fig.S7. Schematic diagram of AgNWs arrangement in conductive layer before and after stretching of PPAP flexible strain sensor.

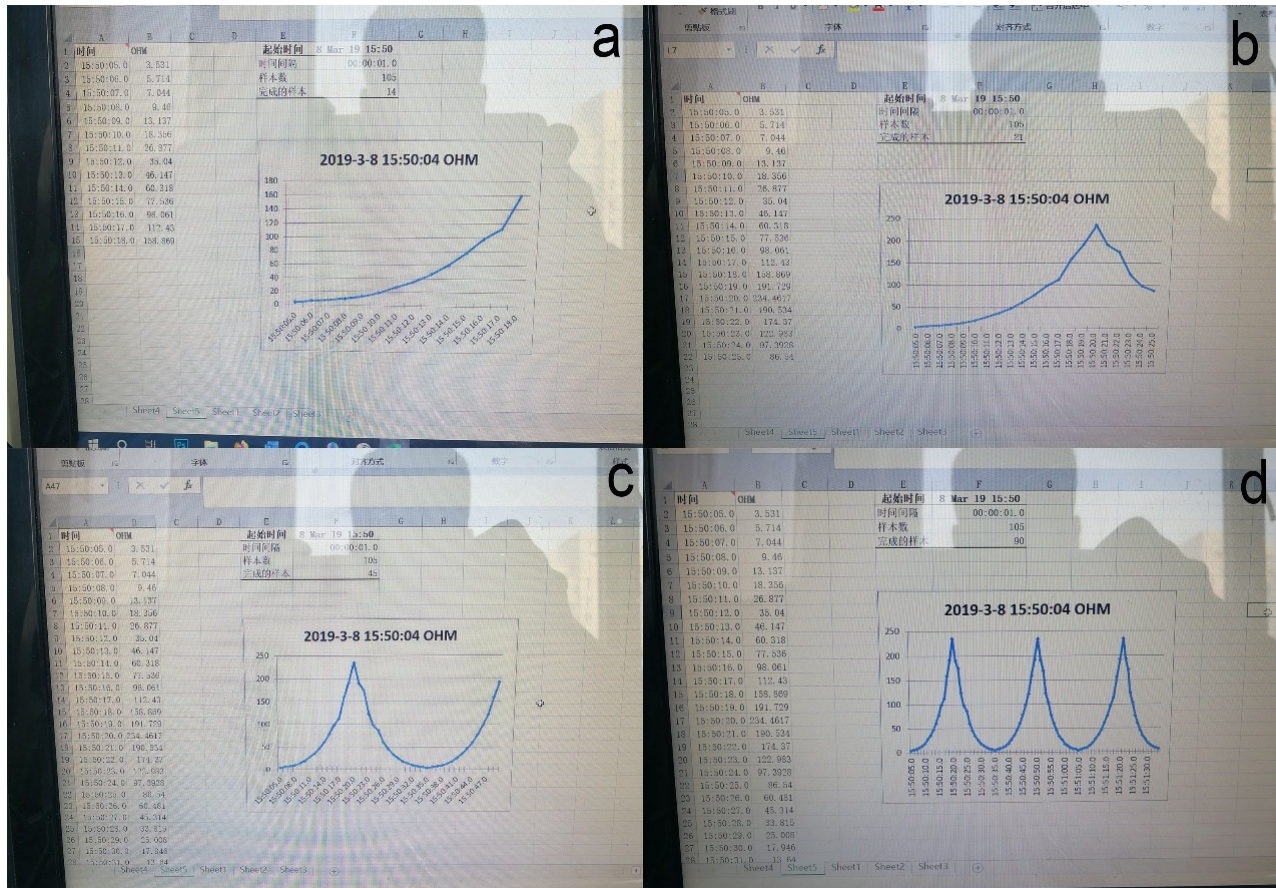

Fig.S8 Instant photos of the PPAP flexible strain sensor containing 0.02g AgNWs in the conductive layer during the tensile-recovery test.

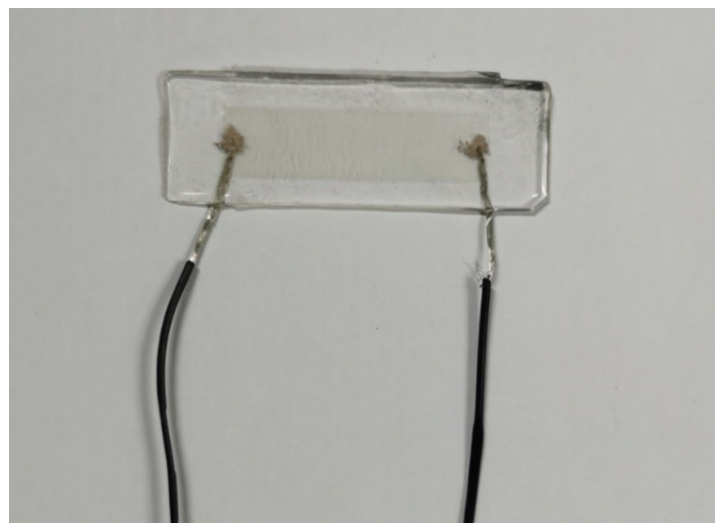

Fig.S9 Sensor with pure PVDF electrospinning membrane as interlayer.



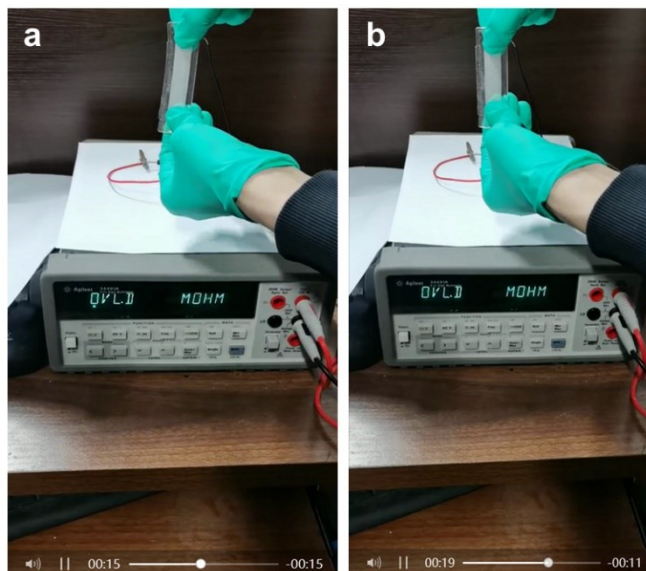

Fig.S10 The resistance value displayed on 34401A multimeter of sensor with pure PVDF electrospinning membrane as interlayer during stretching-releasing process

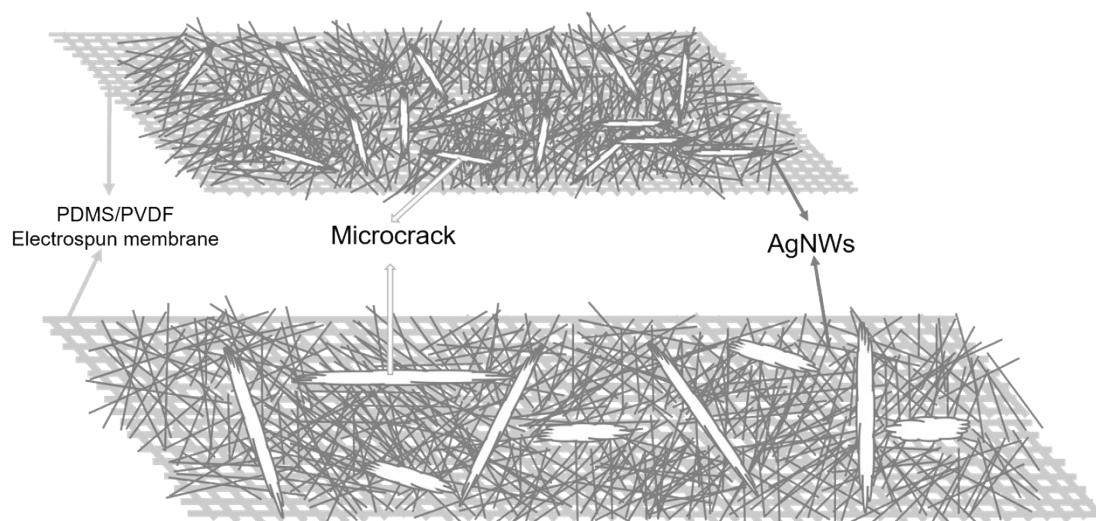

Fig.S11 The schematic illustration figure of the microcrack mechanism.

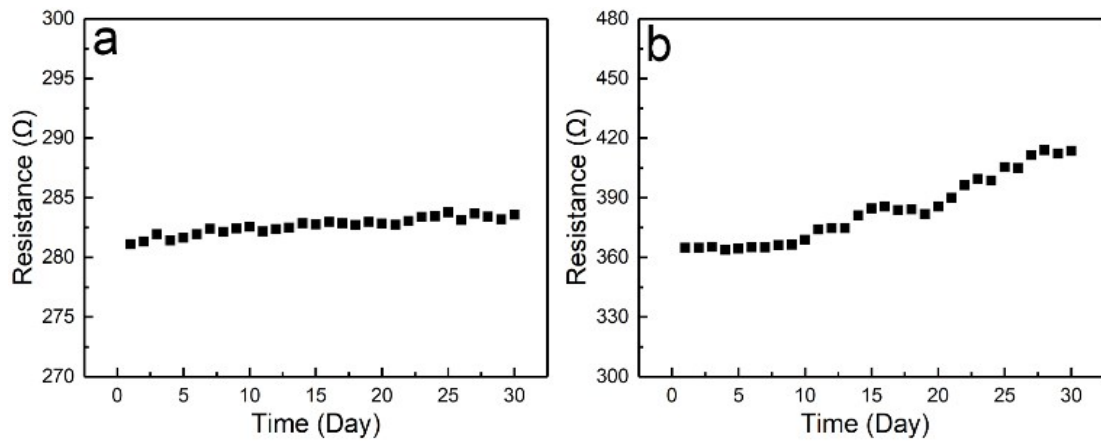

Fig. S12 a) Repeatability test curve of PPAP sensor, and b) Repeatability test curve of sensor with only AgNWs in the conductive layer.
